# Supplementary material
Source: PubMed Central journal article supplement (PMC5365721)

# Figure S1. Reactions for synthesis of DABCO derivatives.

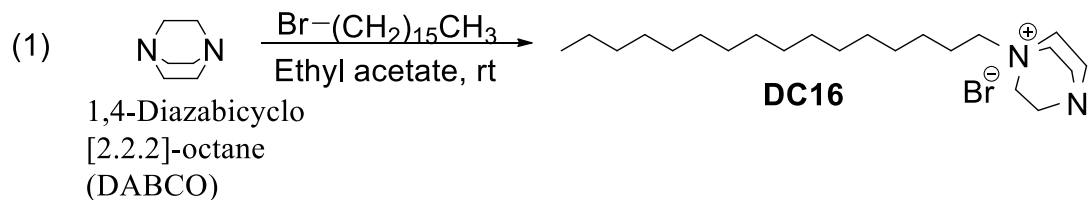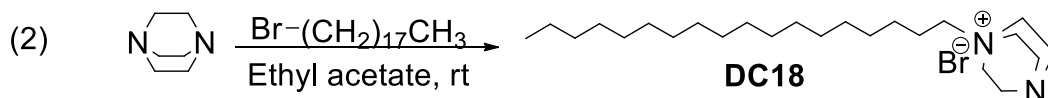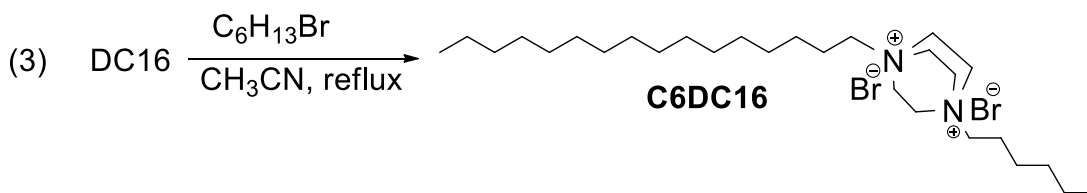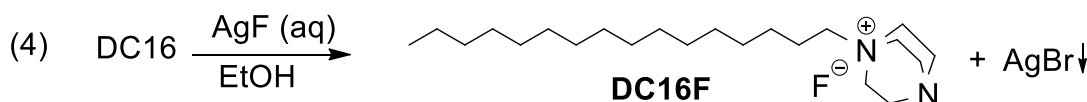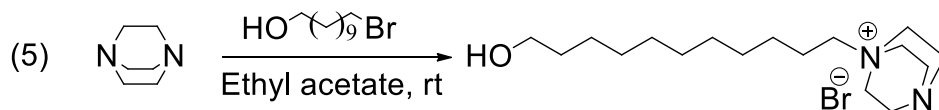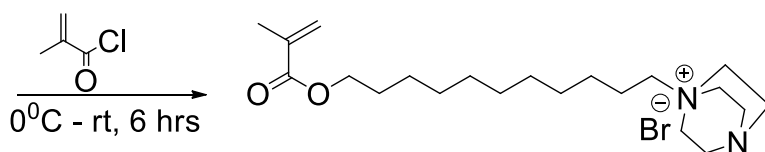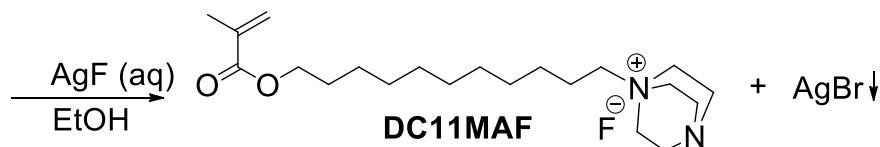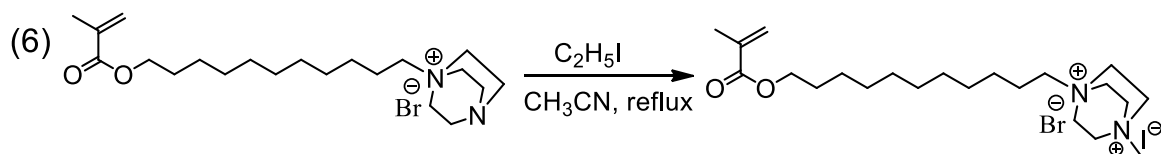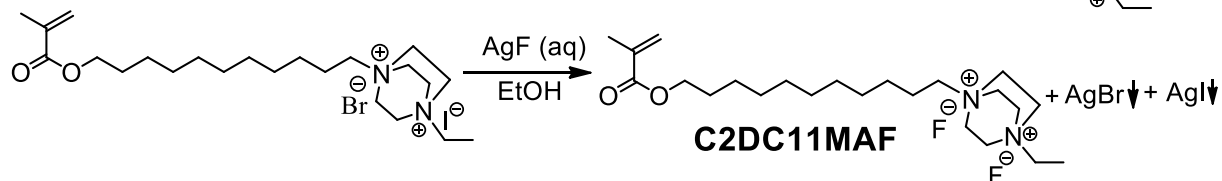

Supplement: AAC.02575-16_zac004176032s1.pdf [file AAC.02575-16_zac004176032s1.pdf]
